# Supplementary material for: Genome assembly and chemogenomic profiling of National Flower of Singapore Papilionanthe Miss Joaquim ‘Agnes’ reveals metabolic pathways regulating floral traits
Source: PubMed Central journal article supplement (PMC9477820; doi:10.1038/s42003-022-03940-6), 2022-09-15
Supplement: 42003_2022_3940_MOESM2_ESM.pdf [file 42003_2022_3940_MOESM2_ESM.pdf]

**a****GenomeScope Profile**

len:2,058,325,691bp uniq:29.1%  
 aa:95.1% ab:4.9%  
 kcov:27.5 err:0.17% dup:0.892 k:21 p:2

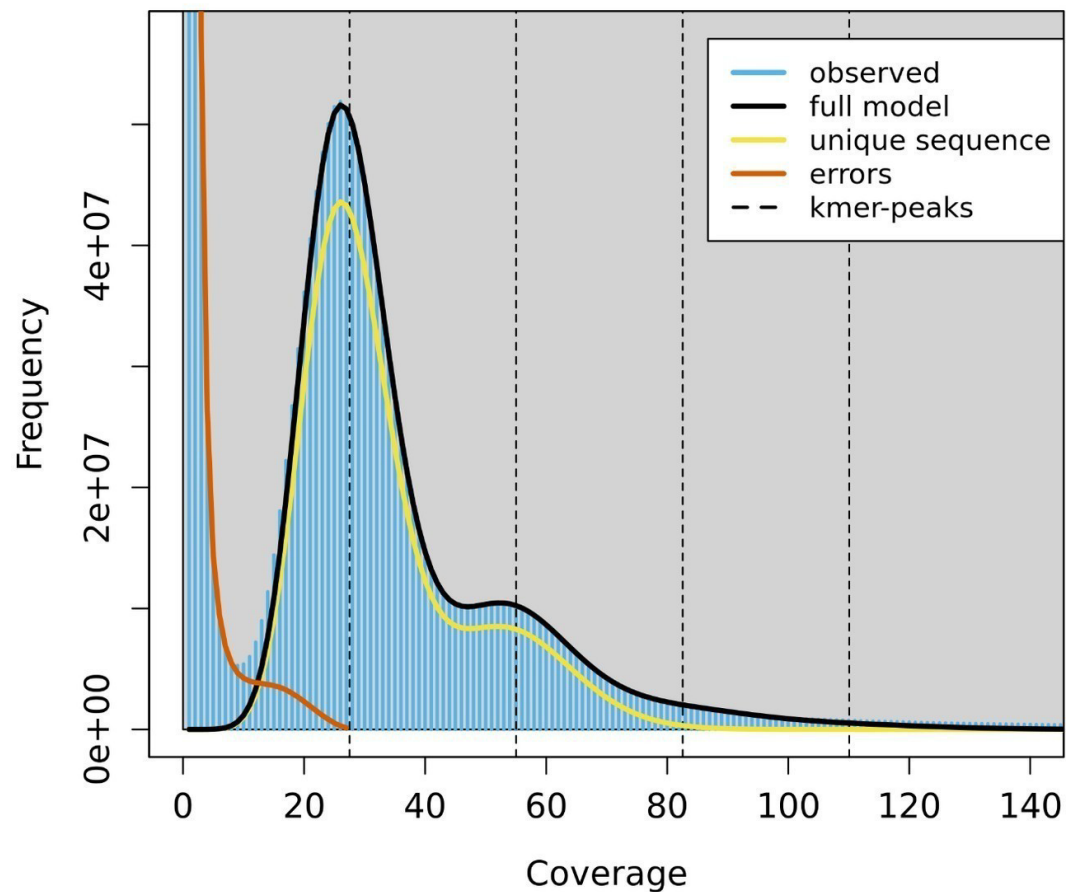**b**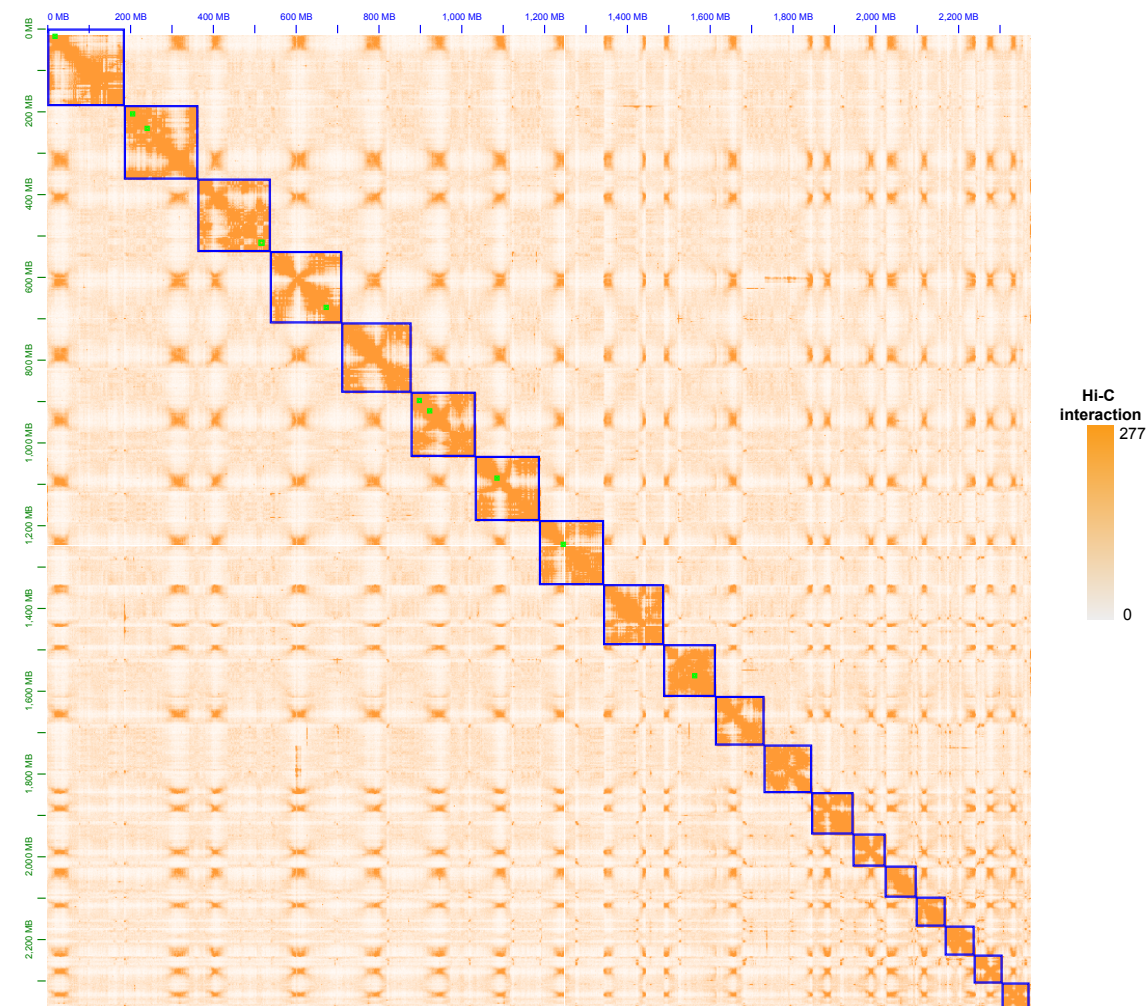

**Supplementary Figure 1:** Genome of *Papilionanthe* Miss Joaquim 'Agnes'

**a** Genome survey of PMJ using GenomeScope Profile

**b** Dovetail Omni-C chromatin interaction post scaffolding showing linkages across 19 chromosomal scaffolds visualized using Juicebox.

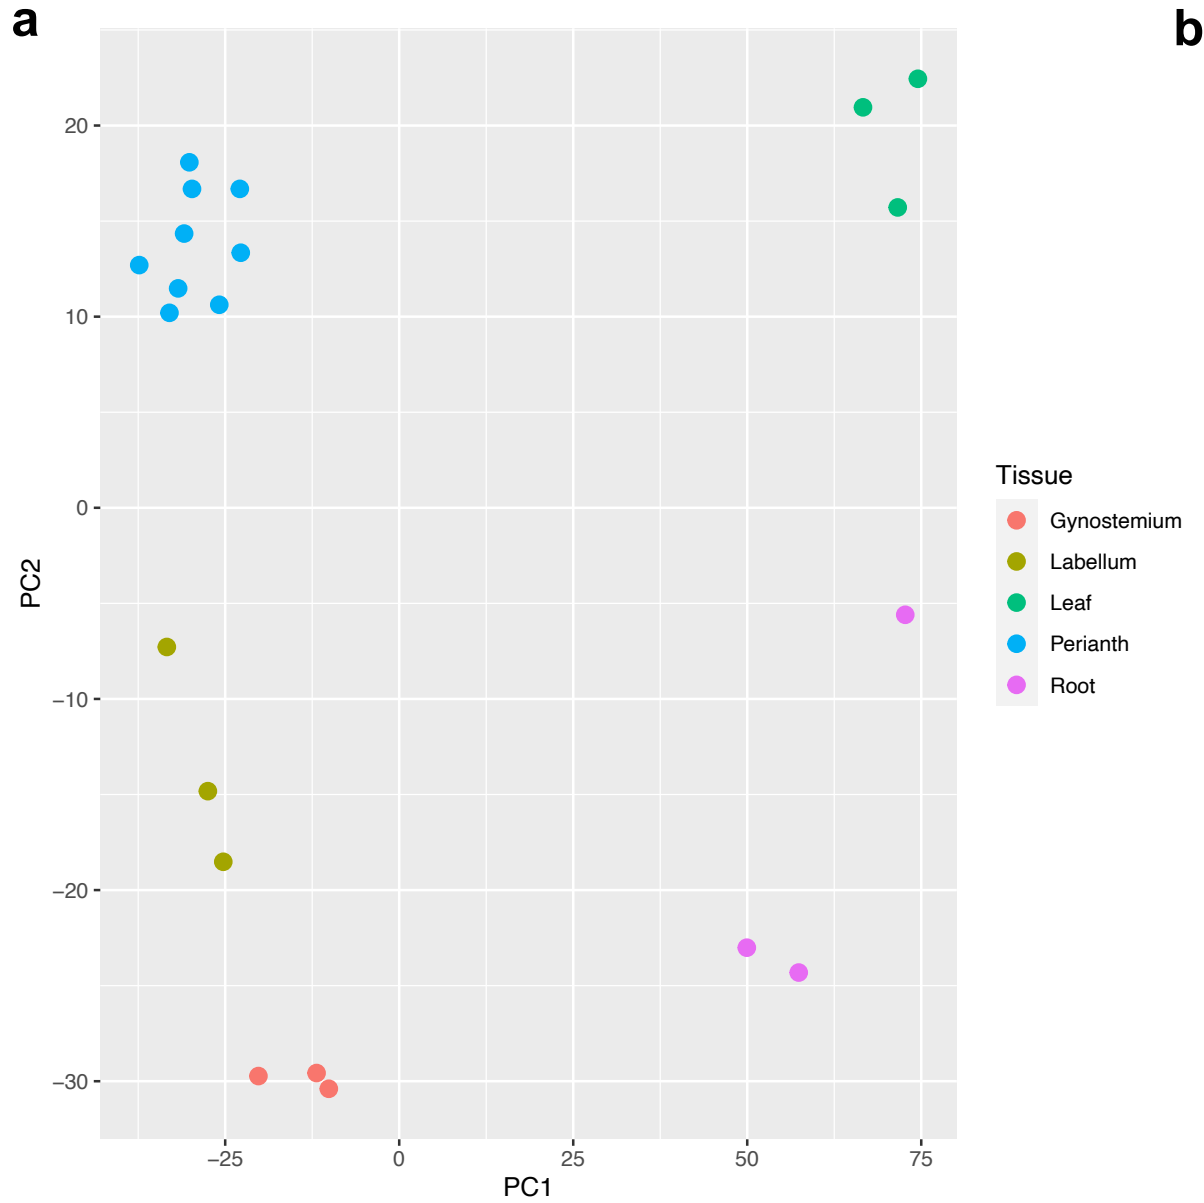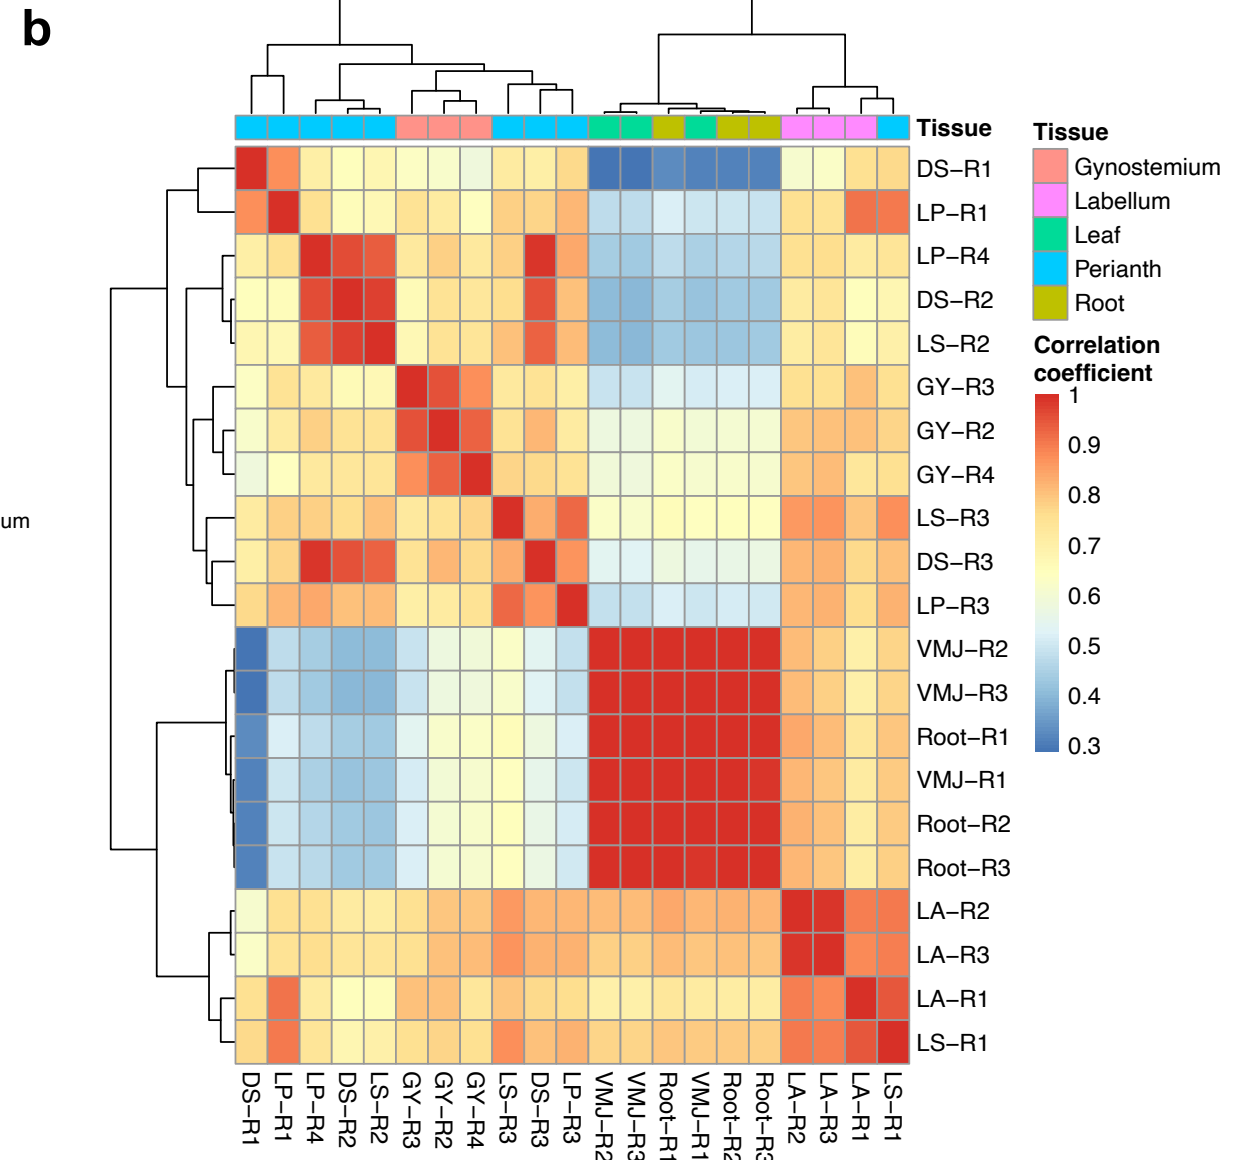

**Supplementary Figure 2: RNA-Seq libraries prepared from the tissues of PMJ**

**a** PCA plot of RNA-Seq libraries showing tissue specific clustering of RNA-Seq libraries for the first two principal components.

**b** Correlation plot with hierarchical clustering of RNA-Seq libraries

**a**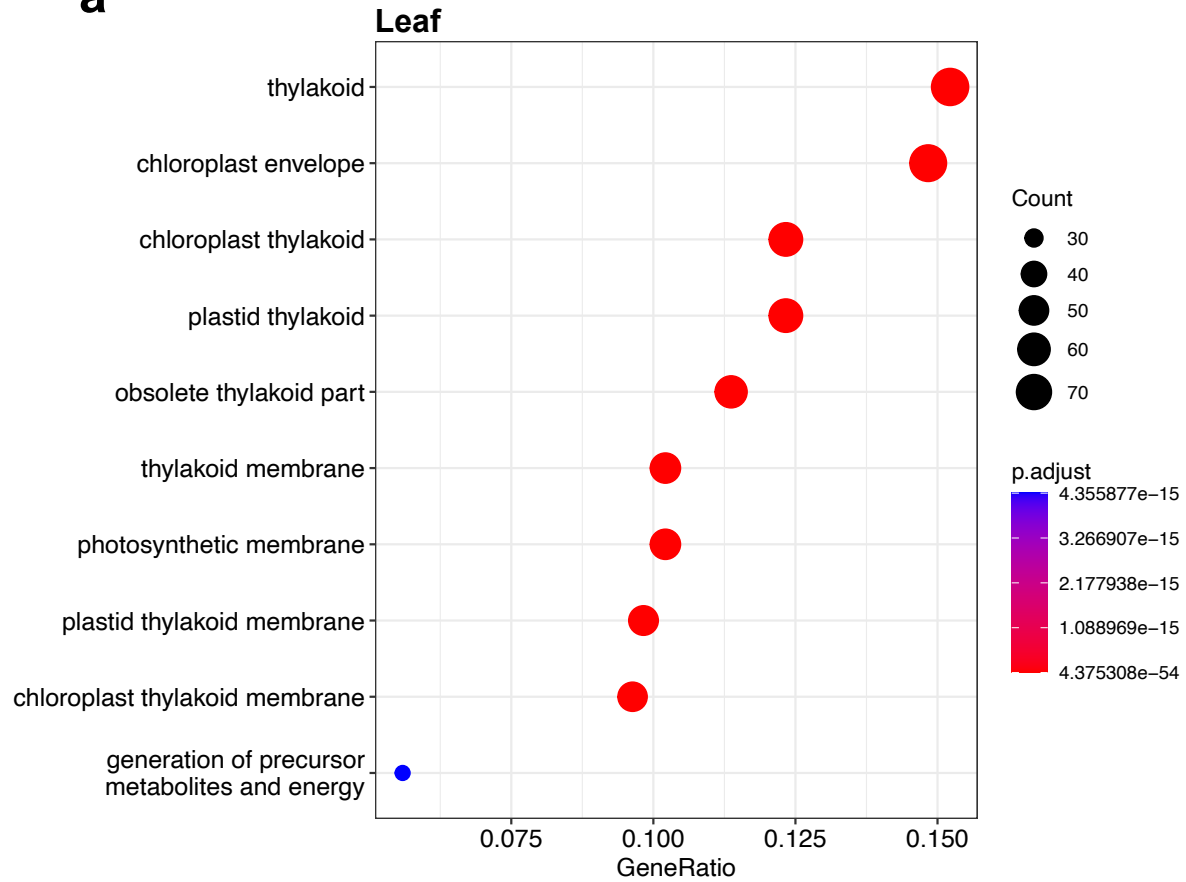**b**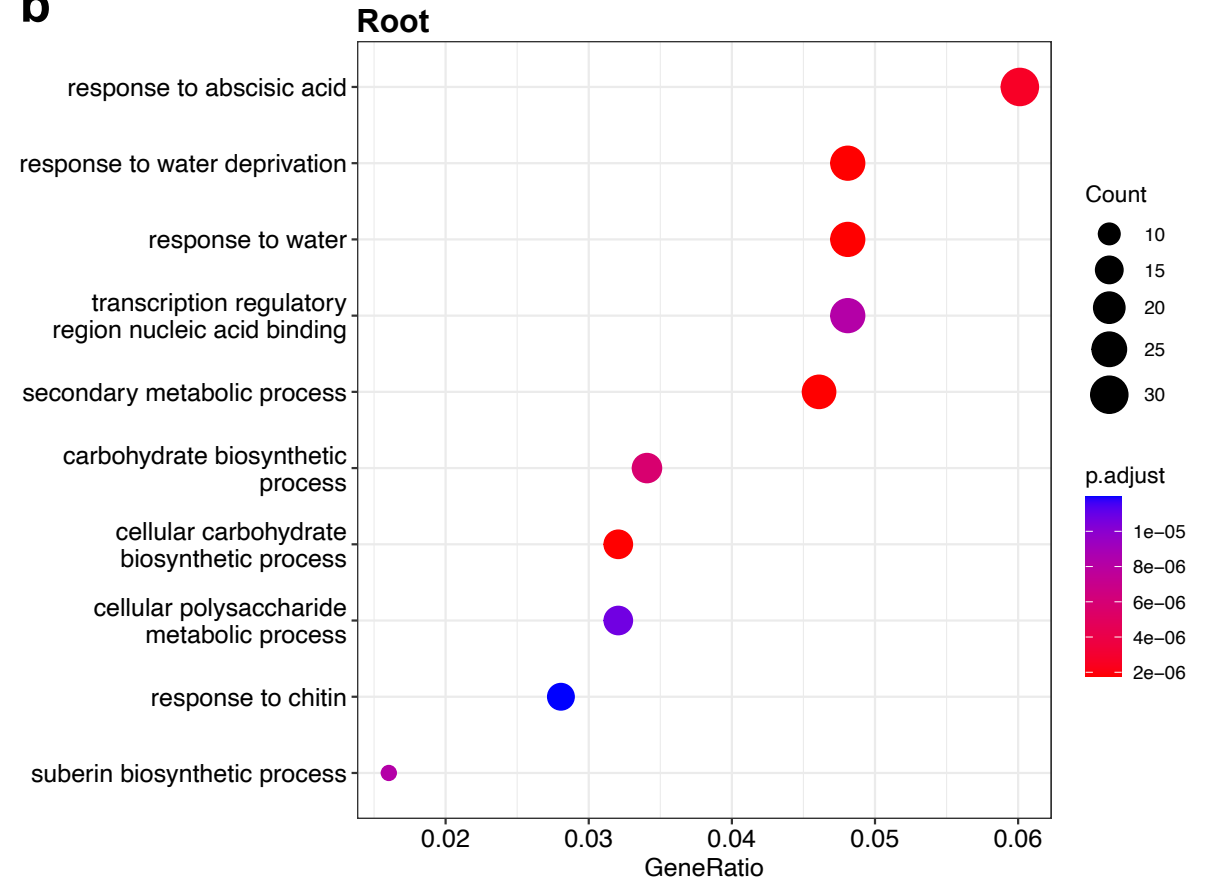

**Supplementary Figure 3:** GO pathway enrichment across tissues of PMJ using tissue specific markers from (a) Terete Leaf (b) Root

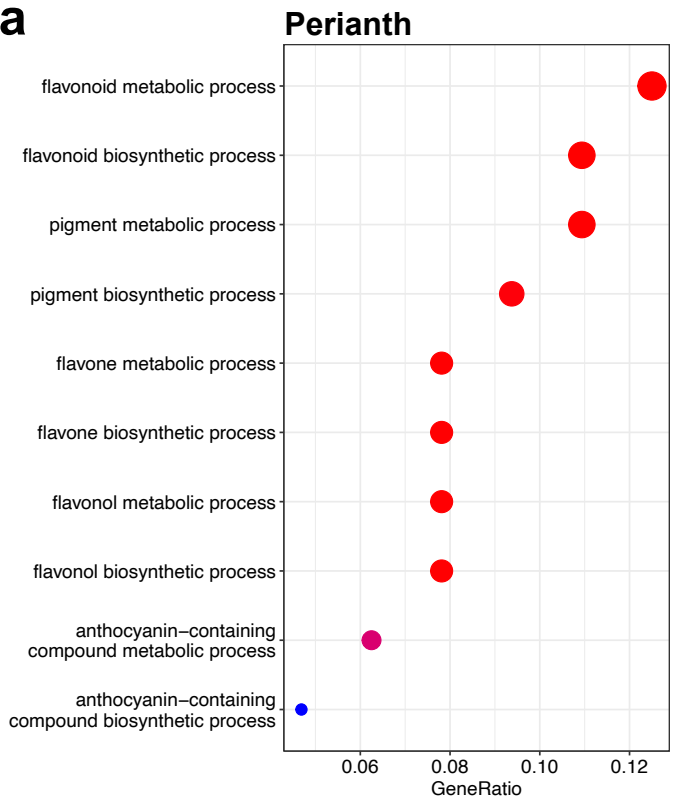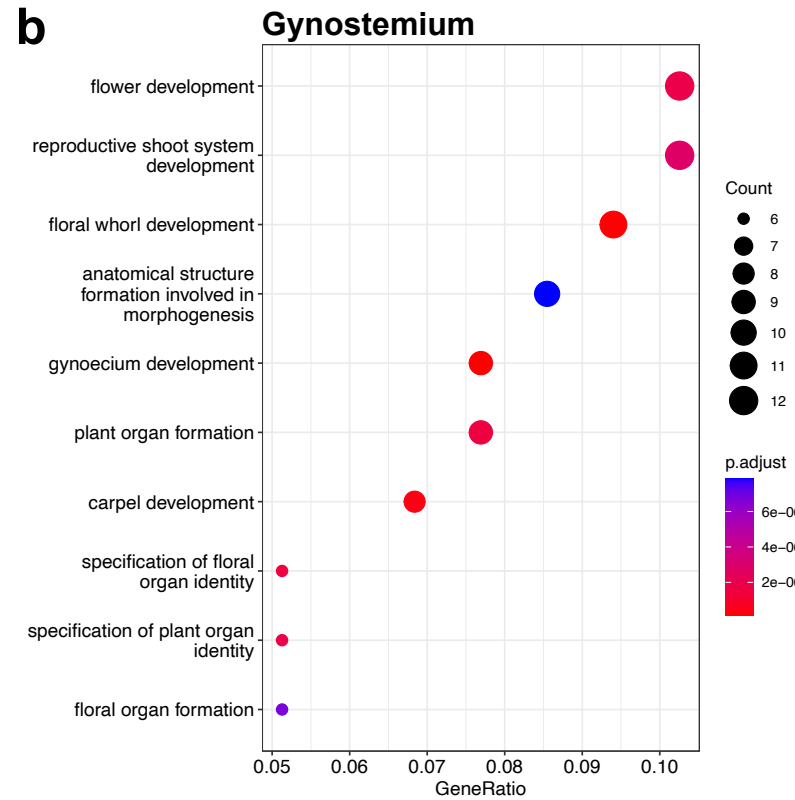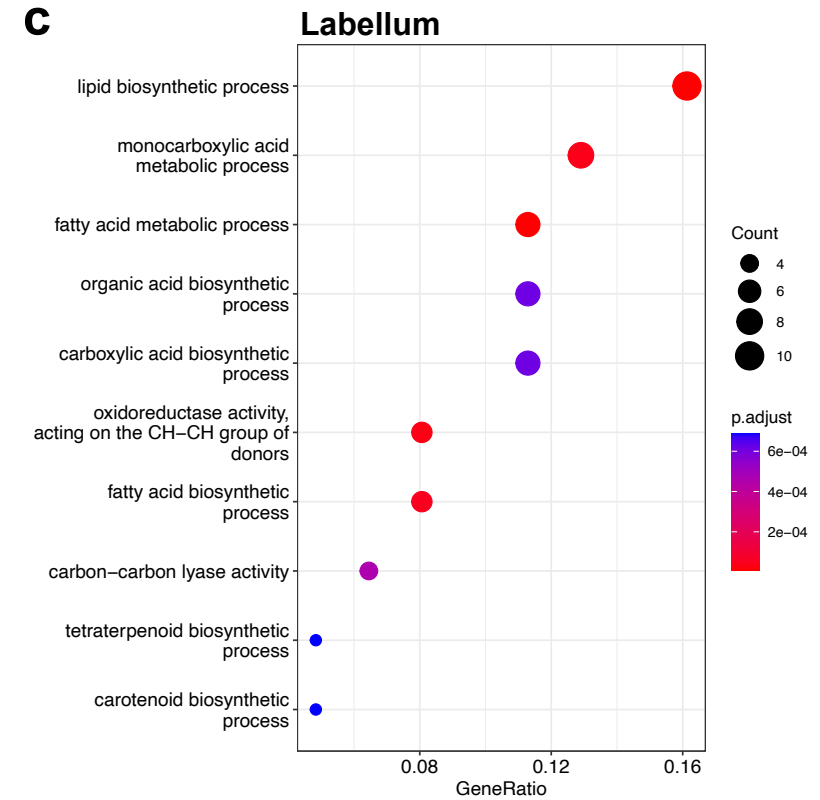

**Supplementary Figure 4:** GO pathway enrichment across floral tissue of PMJ using tissue specific markers from (a) Perianth (b) Gynostemium (c) Labellum

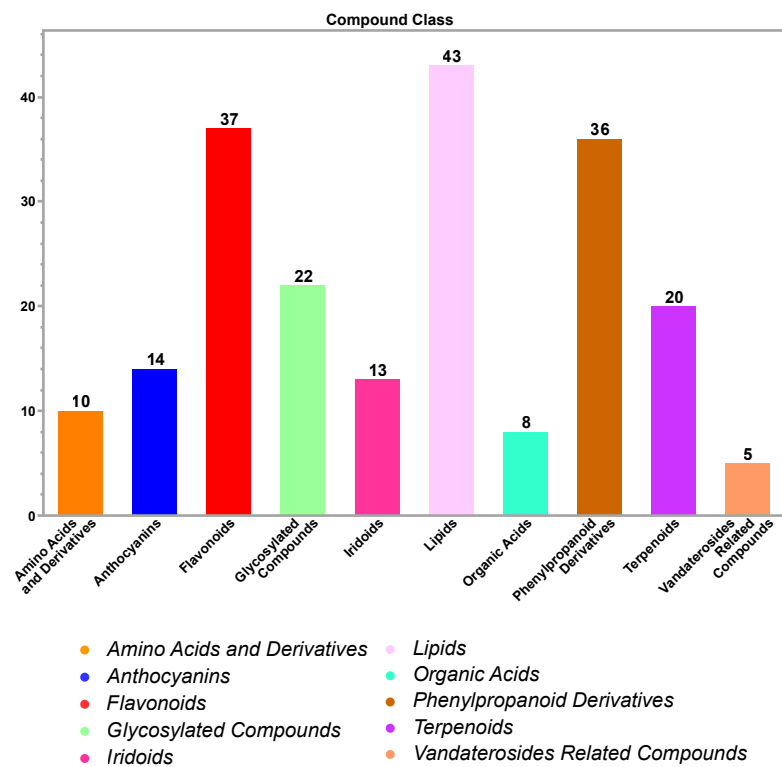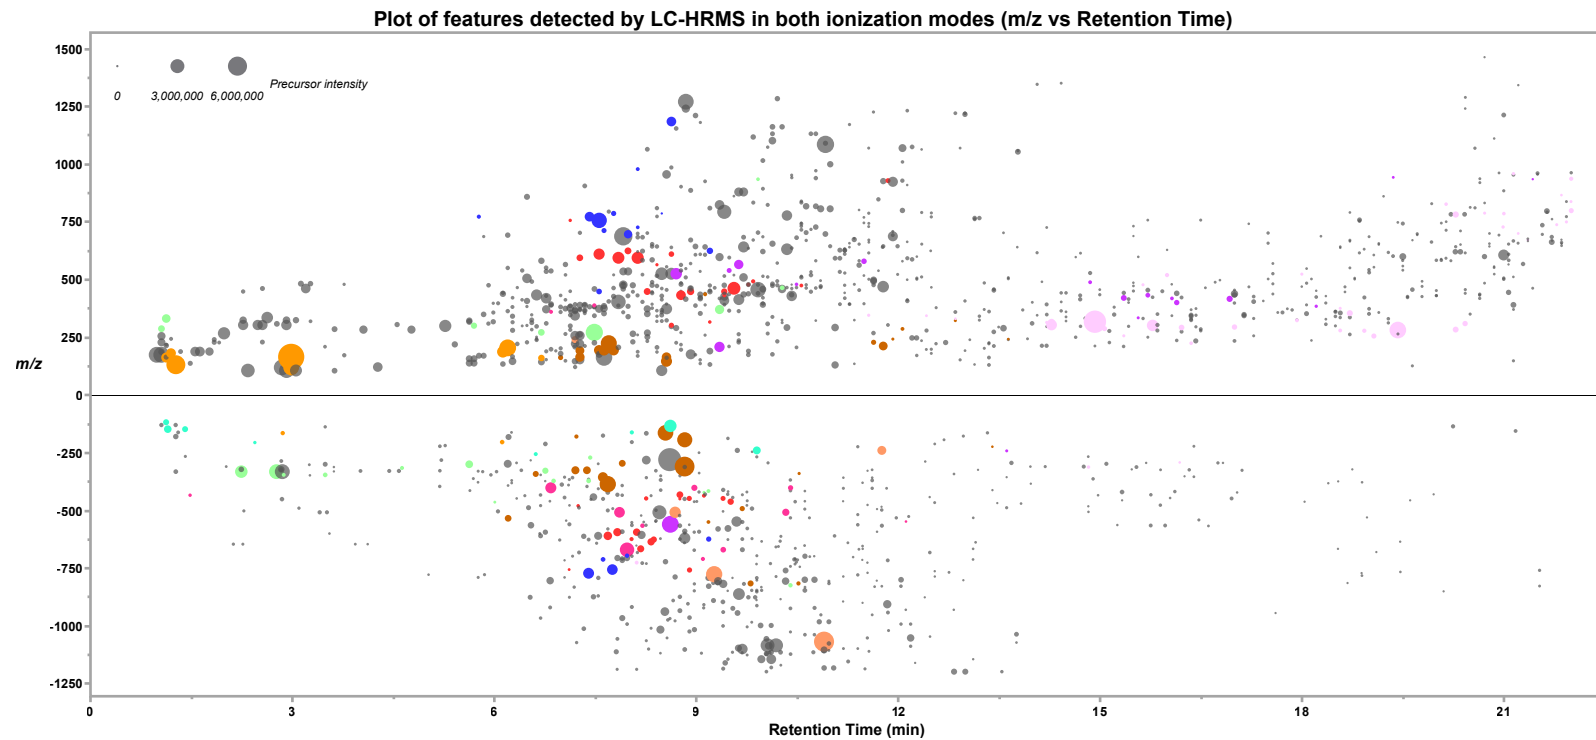

**Supplementary Fig 5: Features detected by LC-HRMS in flower and leaves of *Ple. Miss Joaquim 'Agnes'***

- Bar chart indicating the number of features detected by LC-HRMS across both ionization modes
- Features detected by LC-HRMS in both positive (top) and negative (bottom) modes in the flower and leaves

**a**

| Color                  | Compound                                                |
|------------------------|---------------------------------------------------------|
| Green (chlorophyll)    | Pheophytin-a (degradation product of chlorophyll a)     |
| Green (chlorophyllide) | Phaeophorbide b (degradation product of chlorophyllide) |
| Yellow                 | Apigenin 7-O-(6"-O-acetylglucoside)                     |
| Yellow                 | Apiin (Apigenin 7-O-[beta-D-aposyl-(1->2)-beta-D-       |
| Yellow                 | Cosmosin (Apigenin 7-O-beta-D-glucoside)                |
| Yellow                 | Astragalin (Kaempferol 3-O-glucoside)                   |
| Yellow                 | Astragalin 7-rhamnoside                                 |
| Yellow                 | Kaempferin (Kaempferol 3-O-alpha-L-rhamnoside)          |
| Yellow                 | Kaempferol 3-rhamnoside-7-glucoside                     |
| Yellow                 | Kaempferol 3-sophoroside 7-rhamnoside                   |
| Yellow                 | quercetin                                               |
| Yellow                 | Quercetin 3-O-(6"-malonyl-glucoside) 7-O-glucoside      |
| Yellow                 | Quercetin 3-O-rhamnoside 7-O-glucoside                  |
| Yellow                 | Kaempferol 3-O-beta-D-glucosyl-(1->2)-beta-D-glucoside  |
| Yellow                 | Trifolin (Kaempferol-3-O-galactoside)                   |
| Yellow-orange          | Quercitrin                                              |
| Yellow-orange          | isorhamnetin (Quercetin 3'-methyl ether)                |
| Yellow-orange          | Isorhamnetin 3-rhamnoside                               |
| Yellow-orange          | Isorhamnetin 3-rhamnoside-7-glucoside                   |
| Yellow-orange          | Isorhamnetin 7-glucoside                                |
| Yellow-orange          | Quercetin 3,3'-dimethyl ether 7-glucoside               |
| Reddish purple         | Cyanidin 3-(6"-malonylglucoside)-5-glucoside            |
| Reddish purple         | Cyanidin 3-(6-maly l glucoside) 5-glucoside             |
| Reddish purple         | Cyanidin 3-(6"-sinapylsophoroside)-5-glucoside          |
| Reddish purple         | Cyanidin 3-(disinapoylsophoroside) 5-glucoside          |
| Reddish purple         | Cyanidin 3-glucoside 5-caffeoylglucoside                |
| Reddish purple         | Cyanidin 3-O-beta-D-glucoside 5-O-(6-coumaroyl-beta-D-  |
| Reddish purple         | Cyanidin 3-O-glucoside                                  |
| Reddish purple         | Cyanidin 3-sophoroside-5-glucoside                      |
| Magenta                | Peonidin 3,5-diglucoside                                |
| Magenta                | Peonidin 3-sophoroside 5-glucoside                      |

**b**

## Color Pigment Distribution by Ion Abundance

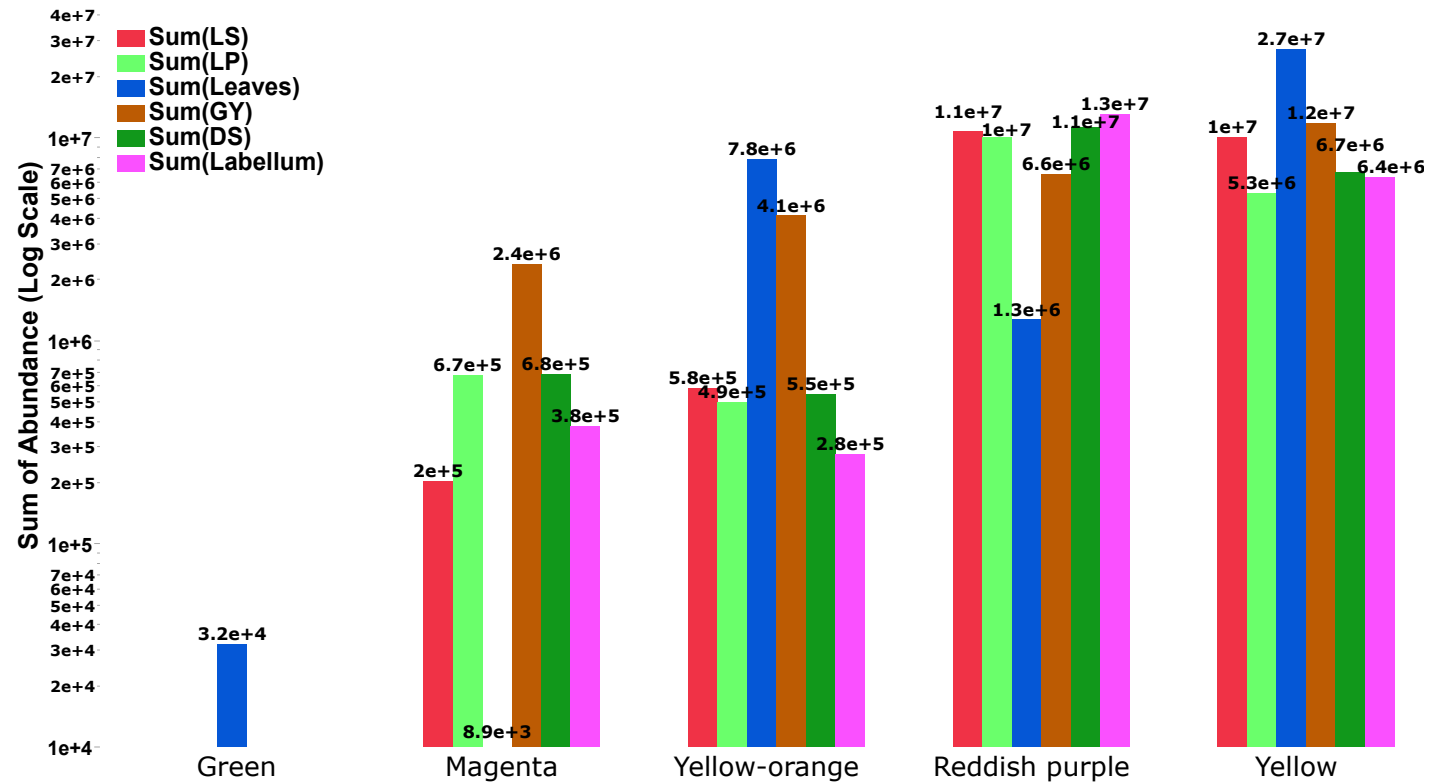

### Supplementary Figure 7 : Compounds of anthocyanin derivatives and their abundance in PMJ

**a** Table showing the associated colors of metabolites detected in the flowers and leaves of PMJ.

**b** Color pigment distribution aggregated through the associated abundance of metabolites detected and their associated color across the various leaf and floral tissues of PMJ.

(LS = Lateral Sepal , LP = Lateral Petal, GY= Gynostemium , DS = Dorsal Sepal)

**Flower**

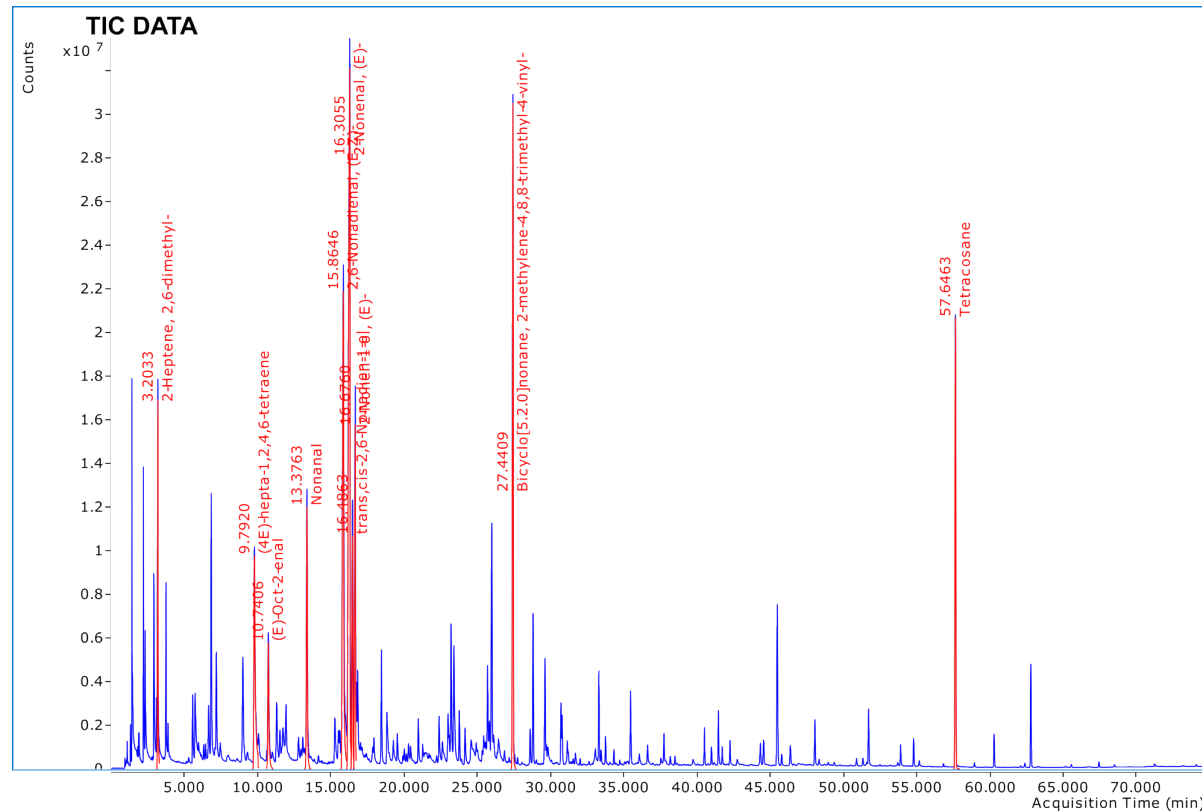

**Terete leaf**

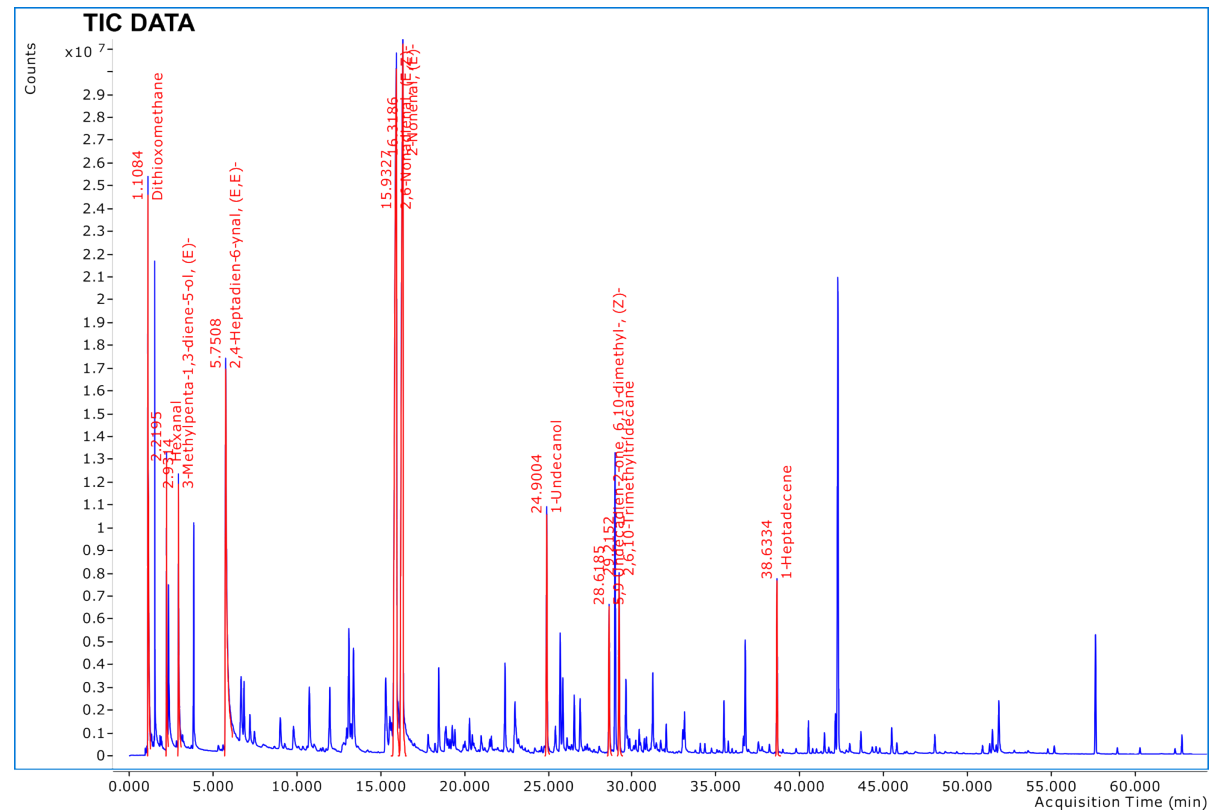

**Supplementary Figure 6:** GC-HRMS chromatogram for PMJ volatiles in the flower and terete leaf of *Ple* Miss Joaquim ‘Agnes’
