# Supplementary material for: Genome assembly and chemogenomic profiling of National Flower of Singapore Papilionanthe Miss Joaquim ‘Agnes’ reveals metabolic pathways regulating floral traits
Source: PubMed Central journal article supplement (PMC9477820; doi:10.1038/s42003-022-03940-6), 2022-09-15
Supplement: 42003_2022_3940_MOESM3_ESM.pdf [file 42003_2022_3940_MOESM3_ESM.pdf]

## Description of Additional Supplementary Files

**File name: Supplementary Data 1**

**Description:** Assembly Scaffold size post proximity ligation scaffolding

**File name: Supplementary Data 2**

**Description: Genome Assembly Stats**

**File name: Supplementary Data 3**

**Description:** Repeat elements masked by Repeat Masker

**File name: Supplementary Data 4**

**Description:** Duplicated genesets in PMJ

**File name: Supplementary Data 5**

**Description:** MADS-box TF Genes in Ple. Miss Joaquim 'Agnes'

**File name: Supplementary Data 6**

**Description:** Enzymes involved in Anthocyanin Pathway

**File name: Supplementary Data 7**

**Description:** Enzymes involved in Stilbenoid/Phenylpropanoid Pathway

**File name: Supplementary Data 8**

**Description:** Curated volatiles identified using GC-HRMS in positive/negative mode

**File name: Supplementary Data 9**

**Description:** Curated Volatile identified using GC-HRMS and their smell profile

**File name: Supplementary Data 10**

**Description:** Beta-ionone synthesis via the carotenoid pathway

**File name: Supplementary Data 11**

**Description:** ONT Library Statistics

**File name: Supplementary Data 12**

**Description:** Shotgun WGS Library Statistics

**File name: Supplementary Data 13**

**Description:** Omni-C Library Statistics

**File name: Supplementary Data 14**

**Description:** RNA-Seq Library Statistics

**File name: Supplementary Data 15**

**Description:** Source data behind Figure 5b

**File name: Supplementary Data 16**

**Description:** Source data behind Figure 6a

**File name: Supplementary Data 17**

**Description:** Wilcoxon pairwise test across tissue group for Figure 6a (\*  $p \leq 0.05$ , \*\*  $p < 0.01$ )

**File name: Supplementary Data 18**

**Description:** Source data behind Fig. 6b

**File name: Supplementary Data 19**

**Description:** Source data behind Figure 8d

**File name: Supplementary Data 20**

**Description:** Wilcoxon pairwise test across tissue group for Figure 8d (\*  $p \leq 0.05$ , \*\*  $p < 0.01$ )
